RESEARCH ARTICLE

# Population Structure and Adaptive Divergence in a High Gene Flow Marine Fish: The Small Yellow Croaker (*Larimichthys polyactis*)

Bing-Jian Liu<sup>1,2,3</sup>, Bai-Dong Zhang<sup>1,2,3</sup>, Dong-Xiu Xue<sup>1,2</sup>, Tian-Xiang Gao<sup>4</sup>, Jin-Xian Liu<sup>1,2\*</sup>

**1** Key Laboratory of Marine Ecology and Environmental Science, Institute of Oceanology, Chinese Academy of Sciences, Qingdao, Shandong, China, **2** Laboratory for Marine Ecology and Environmental Science, Qingdao National Laboratory for Marine Science and Technology, Qingdao, China, **3** University of Chinese Academy of Sciences, Beijing, China, **4** School of Fisheries, Zhejiang Ocean University, Zhoushan, Zhejiang, China

☞ These authors contributed equally to this work.

\* [jinxianliu@gmail.com](mailto:jinxianliu@gmail.com)

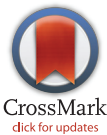

**OPEN ACCESS**

**Citation:** Liu B-J, Zhang B-D, Xue D-X, Gao T-X, Liu J-X (2016) Population Structure and Adaptive Divergence in a High Gene Flow Marine Fish: The Small Yellow Croaker (*Larimichthys polyactis*). PLoS ONE 11(4): e0154020. doi:10.1371/journal.pone.0154020

**Editor:** Yong-Gang Yao, Kunming Institute of Zoology, Chinese Academy of Sciences, CHINA

**Received:** December 21, 2015

**Accepted:** April 7, 2016

**Published:** April 21, 2016

**Copyright:** © 2016 Liu et al. This is an open access article distributed under the terms of the [Creative Commons Attribution License](https://creativecommons.org/licenses/by/4.0/), which permits unrestricted use, distribution, and reproduction in any medium, provided the original author and source are credited.

**Data Availability Statement:** All relevant data are within the paper and its Supporting Information files.

**Funding:** The study was supported by the Joint Project of the National Natural Science Foundation of China and Shandong Province: Marine Ecology and Environmental Sciences (U1406403) to JXL, the National Natural Science Foundation of China (No. 30471329) to TXG, and 100 Talents Program of the Chinese Academy of Sciences to JXL; and the Strategic Priority Research Program of Chinese Academy of Sciences (No.XDA11020704). The funders had no role in study design, data collection

## Abstract

The spatial distribution of genetic diversity has been long considered as a key component of policy development for management and conservation of marine fishes. However, unravelling the population genetic structure of migratory fish species is challenging due to high potential for gene flow. Despite the shallow population differentiation revealed by putatively neutral loci, the higher genetic differentiation with panels of putatively adaptive loci could provide greater resolution for stock identification. Here, patterns of population differentiation of small yellow croaker (*Larimichthys polyactis*) were investigated by genotyping 15 highly polymorphic microsatellites in 337 individuals of 15 geographic populations collected from both spawning and overwintering grounds. Outlier analyses indicated that the locus Lpol03 might be under directional selection, which showed a strong homology with Grid2 gene encoding the glutamate receptor  $\delta 2$  protein (GluR $\delta 2$ ). Based on Lpol03, two distinct clusters were identified by both STRUCTURE and PCoA analyses, suggesting that there were two overwintering aggregations of *L. polyactis*. A novel migration pattern was suggested for *L. polyactis*, which was inconsistent with results of previous studies based on historical fishing yield statistics. These results provided new perspectives on the population genetic structure and migratory routes of *L. polyactis*, which could have significant implications for sustainable management and utilization of this important fishery resource.

## Introduction

Marine fishes are generally expected to show much lower geographical differentiation than their freshwater counterparts, which is understandable in light of lacking geographical barriers

and analysis, decision to publish, or preparation of the manuscript.

**Competing Interests:** The authors have declared that no competing interests exist.

within marine habitats as compared to freshwater habitats [1, 2]. In marine environments, many studies have failed to detect statistically significant population genetic structure among populations, which is most likely due to the persistence of extensive gene flow [1, 3, 4]. However, more and more population genetic studies based on microsatellites and SNPs have revealed low but statistically significant differentiation among populations of marine fishes, opening the possibility for detecting cryptic population structure in highly abundant and widely distributed migratory marine fishes [5–11]. Recently, studies have reported signatures of natural selection and local adaptation in marine fishes [4, 12, 13]. For example, Vandamme *et al.* [12] investigated population structure of turbot (*Scophthalmus maximus*) by using gene-associated markers in combination with seascape variables for 290 sampling locations throughout the northeast Atlantic Ocean, and results suggested that stable environmental selection pressure contributes to relatively strong local adaptation in the Baltic Sea. Larmuseau *et al.* [13] detected population differentiation in the rhodopsin gene of the sand goby (*Pomatoschistus minutus*), suggesting local adaptation to water turbidity between northern and southern North Sea populations. Various environmental transitions, such as salinity and temperature gradients, have been currently demonstrated to be associated with local adaptation of populations to their native environment [12, 14]. In addition, behavioral mechanisms such as natal homing [15] as well as oceanographical features such as fronts and currents [16, 17] may also be associated with genetic divergence. Therefore, discerning contributions of different mechanisms in shaping and maintaining patterns of population differentiation as well as identifying genes under selection is essential to better understand complex population structure and dynamics of marine organisms, which is crucial for maintaining their long-term sustainability and resilience to future environmental changes [18, 19].

The small yellow croaker, *Larimichthys polyactis* (Bleeker, 1877), is an important fishery species endemic to the Northwest Pacific, inhabiting coastal waters across the Bohai Sea, the Yellow Sea and the East China Sea [20]. *L. polyactis* is an asynchronous and multiple spawner with relatively long-distance seasonal migration [21]. Spawning grounds of *L. polyactis* are always located in estuaries or mixed areas of both low and high salinity near the shore area, while their overwintering grounds are located in the off shore area [22]. Overwintering aggregations of *L. polyactis* migrate to the spawning grounds in early April and start spawning from late April to June with a gradual spatial and temporal variation among different geographic populations [22]. After spawning, these fishes continuously aggregated into large feeding groups in nearby coastal waters, and they migrate to overwintering grounds from September to October [22, 23]. Previous studies indicated that *L. polyactis* were presumed to migrate towards natal sites to spawn and two geographic populations existed, one in the Northern Yellow Sea and Bohai Sea, and the other in Southern Yellow Sea and East China Sea, respectively [22–24]. As one of the most important commercial fishery resources, abundance of *L. polyactis* had severely declined since the 1970s in China due to anthropogenic factors such as overfishing, seawater pollution, as well as ocean current and water masses changes [25–28]. Comparing with its historical biological characteristics, distinct trends of biological parameter changes have been observed in *L. polyactis*, such as miniaturization, domination of low age groups, increases in growth rate but decreases in body length and weight, etc. [29]. Therefore, it is urgently needed to have a better understanding of population genetic structure and migratory routes for *L. polyactis*, which have important consequences for conservation, effective management and sustainable utilization of this important fishery resource.

Although *L. polyactis* has been the subject of many studies regarding population differentiation, studies on population dynamics, morphology, anatomy, and population genetics obtained discrepant or even conflicting results [30–34]. Previous researches based on historical fishing yield statistics could hardly provide explicit patterns of population structure as well as

migration since the capture data was somehow limited [23, 24]. Meanwhile, traditional approaches of tagging experiments exhibited extremely low mark-recapture rates most likely due to the intensive fishing pressure [23, 24]. It has been previously demonstrated that oceanographic features, such as eddies and fronts, representing shift in temperature, salinity or food availability may also prevent random mixing and diffusion of marine organisms [16, 17, 35]. Although previous studies have suggested that environment factors, such as the Yellow Sea Warm Current (YSWC) and the Tsushima warm current and Kuroshio, were correlated with the migration and distribution of *L. polyactis*, genetic evidence for correlations between sea currents and migration or distribution of *L. polyactis* has not yet been reported in literature. Recent genetic studies based on RAPD and AFLP [30–32] demonstrated that there were three populations of *L. polyactis*, while studies based on mitochondrial (mtDNA) [33, 34] and microsatellite markers [4, 36] showed no significant population differentiation, suggesting panmixia in *L. polyactis*. In contrast to most previous studies, Wang *et al.* (2013) [4] found two microsatellites under diversifying selection and illustrated that the adaptive differentiation of *L. polyactis* could add to the understanding of the population structure and thus serves as important information for establishing conservation strategies. In addition, it is emphasized that the accuracy of genetic mixed-stock analysis (MSA) using microsatellite markers for marine fish species is mainly limited by the relatively low level of genetic divergence [37]. Therefore, a comprehensive population genetic analysis of *L. polyactis* is still needed to assess patterns of population genetic divergence throughout its distribution and to resolve discrepant results.

In the present study, a total of 15 novel polymorphic microsatellite markers were used to assess the levels of genetic diversity and patterns of population genetic divergence of *L. polyactis* populations. Our sampling scheme covered nearly the entire distribution range of *L. polyactis* including both nearshore spawning and offshore overwintering grounds, representing an open system experiencing multidirectional migration between relatively isolated populations across several environmental gradients. Accordingly, this sampling scheme enhanced our capability to infer processes shaping population structure and migration routes of *L. polyactis*. Overall, results of the present study could provide useful insights into delineating fine population genetic structure and uncovering possible processes leading to adaptive divergence in *L. polyactis*, which should have important implications for the management and conservation of this fishery species.

## Materials and Methods

### Ethics statement

The field studies did not involve any endangered or protected species. *L. polyactis* is not protected by Chinese law or by any of the countries where and when sampling was performed. It is a commercially harvested species in China and the other Northeast Asian countries. The samples were collected by trawling and fishes were already dead when collected.

### Sampling and DNA extraction

A total of 337 *L. polyactis* adult individuals were collected from 15 geographical locations (Fig 1; Table 1), including 10 locations along the coast of China (Dandong, BLA, BLB, Qinhuangdao, Dongying, Weihai, Qingdao, Wenling, Xiapu and Yangtze River Estuary) and five locations from offshore areas of the Yellow Sea and the East China Sea (SYA, SYB, SYC, NEA, NEB). All the samples were collected from natural fishing grounds between March 2005 and September 2014 using direct fishing techniques. Caudal fin or muscle tissue samples were collected and preserved in 95% (v/v) ethanol at -80°C. Total genomic DNA was extracted using

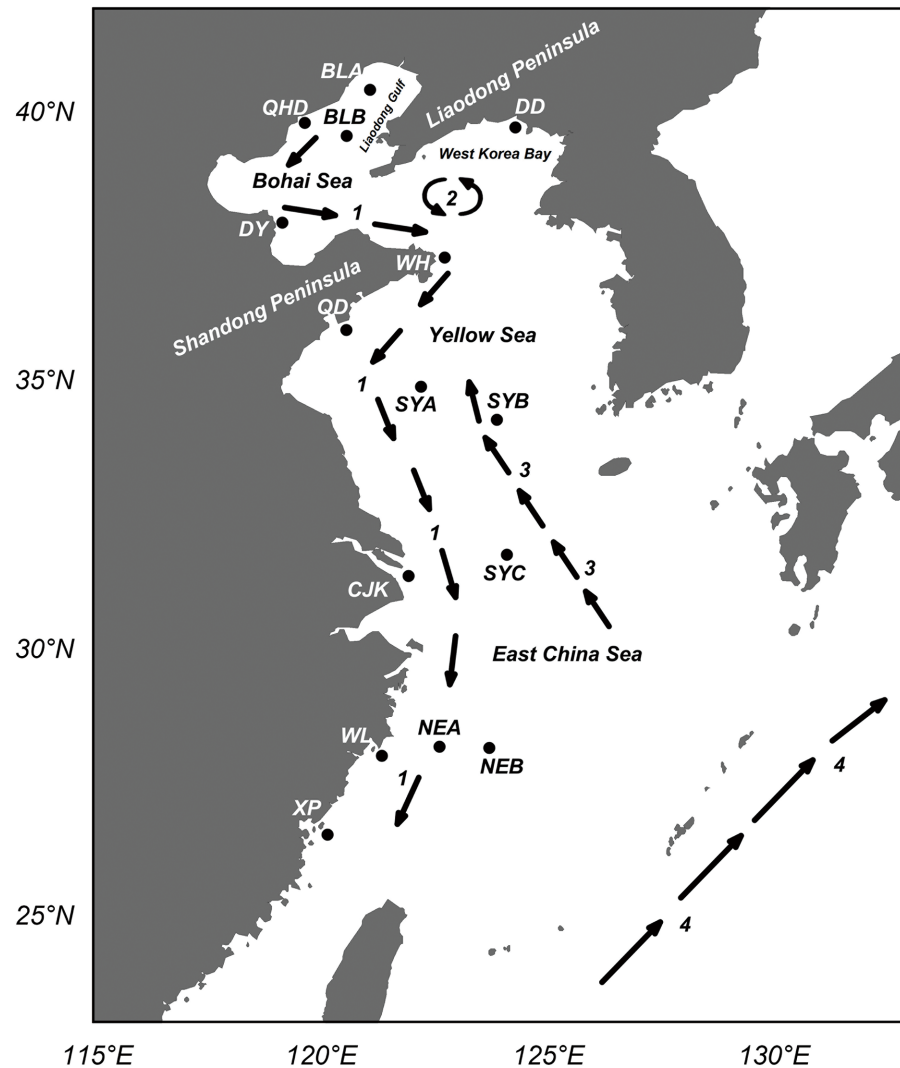

**Fig 1. Map showing sample locations of *L. polyactis* and ocean currents (1 to 4).** Detailed sample information is shown in Table 1. 1, China Coastal Current; 2, Northern Yellow Sea Cold Water Mass (NYSCWM); 3, Yellow Sea Warm Current (YSWC); 4, Kuroshio Current.

doi:10.1371/journal.pone.0154020.g001

the standard phenol-chloroform protocol. Extracted DNA was checked using 1.5% agarose gel electrophoresis and then stored at -20°C.

### Microsatellite Genotyping

All samples were genotyped at 15 microsatellite loci (Lpol02, Lpol03, Lpol04, Lpol05, Lpol06, Lpol08, Lpol09, Lpol10, Lpol11, Lpol12, Lpol13, Lpol14, Lpol15, Lpol16 and Lpol17) originally developed by Liu *et al.* [38]. The 15 highly polymorphic loci were amplified following the PCR protocol described in [39]. Fluorescently-labeled PCR products were electrophoresed on an ABI3730 XL DNA sequencer with the LIZ-500 size standard (Applied Biosystems). Alleles were called using GENEMAKER software version 2.2.0 (Soft-Genetics, State College, PA, USA). The microsatellite genotype data for *Larimichthys polyactis* is provided as a supporting information file (S1 File).

**Table 1. Sampling information and genetic variation indices for microsatellites.**

| Locality              | Abb. | Coordinates      | Sampling date | Sample size | Av $H_O$ | Av $H_E$ | Av $PIC$ | Av $A_R$ | $F_{IS}$ |
|-----------------------|------|------------------|---------------|-------------|----------|----------|----------|----------|----------|
| Dandong               | DD   | 39°50'N,124°12'E | 2014.05       | 24          | 0.806    | 0.888    | 0.857    | 11.677   | 0.095    |
| BLA                   | BLA  | 40°15'N,121°45'E | 2007.10       | 24          | 0.794    | 0.886    | 0.855    | 11.233   | 0.106    |
| BLB                   | BLB  | 39°45'N,120°45'E | 2007.10       | 24          | 0.803    | 0.890    | 0.860    | 11.188   | 0.100    |
| Qinhuangdao           | QHD  | 39°55'N,119°37'E | 2014.09       | 15          | 0.822    | 0.873    | 0.828    | 10.942   | 0.060    |
| Dongying              | DY   | 37°45'N,119°15'E | 2009.09       | 16          | 0.687    | 0.862    | 0.814    | 10.085   | 0.209    |
| Weihai                | WH   | 37°20'N,123°20'E | 2009.09       | 24          | 0.770    | 0.889    | 0.858    | 11.317   | 0.136    |
| Qingdao               | QD   | 36°N,120°30'E    | 2009.09       | 20          | 0.796    | 0.876    | 0.840    | 10.933   | 0.094    |
| SYA                   | SYA  | 35°19'N,122°E    | 2005.04       | 24          | 0.767    | 0.891    | 0.860    | 11.137   | 0.142    |
| SYB                   | SYB  | 33°58'N,123°30'E | 2005.04       | 24          | 0.735    | 0.881    | 0.848    | 10.815   | 0.168    |
| SYC                   | SYC  | 31°45'N,124°05'E | 2005.03       | 23          | 0.793    | 0.895    | 0.864    | 11.300   | 0.116    |
| Yangtze River estuary | CJK  | 31°05'N,121°59'E | 2013.11       | 20          | 0.797    | 0.875    | 0.839    | 11.191   | 0.092    |
| NEA                   | NEA  | 28°30'N,123°30'E | 2007.09       | 23          | 0.823    | 0.900    | 0.869    | 11.824   | 0.087    |
| NEB                   | NEB  | 28°30'N,123°E    | 2007.09       | 30          | 0.717    | 0.887    | 0.860    | 11.111   | 0.194    |
| Wenling               | WL   | 28°15'N,121°29'E | 2014.03       | 22          | 0.827    | 0.889    | 0.857    | 11.463   | 0.072    |
| Xiapu                 | XP   | 26°50'N,120°07'E | 2014.03       | 24          | 0.783    | 0.887    | 0.856    | 11.515   | 0.119    |

Abbreviation of populations (Abb.), average of observed heterozygosity (Av  $H_O$ ), average of expected heterozygosity (Av  $H_E$ ), average of Polymorphism Information Content (Av  $PIC$ ), average of allelic richness (Av  $A_R$ ) and inbreeding coefficient ( $F_{IS}$ ).

doi:10.1371/journal.pone.0154020.t001

## Data analysis

**Genetic diversity.** For each population, genetic variation indices including polymorphism information content ( $PIC$ ), observed heterozygosity ( $H_O$ ) and expected heterozygosity ( $H_E$ ) were calculated using the Excel Microsatellite Toolkit [40]. Inbreeding coefficient ( $F_{IS}$ , a measure of the extent of nonrandom mating), and allelic richness ( $A_R$ , an estimate of allelic diversity independent of sample size) were computed in FSTAT 2.9 [41]. Deviations from Hardy-Weinberg equilibrium (HWE) for each locus in each population and linkage disequilibrium (LD) between pairs of loci were tested in GENEPOP 4.3 using the Markov chain methods (10000 dememorizations, 1000 batches, and 10000 iterations per batch) [42, 43]. The software MICRO-CHECKER 2.2.0 [44] was used to test for technical artefacts such as null alleles, stuttering and large allele dropout.

**Outlier tests.** FIDST2 [45] implemented in LOSITAN [46] was applied to identify potential outliers. This method calculates  $F_{ST}$  for each locus and assumes that outlier loci under diversifying selection would show increased level of population differentiation compared to simulated distribution of loci based on observed level of population differentiation. Thus loci with unusually high  $F_{ST}$  values were regarded as potentially being under directional selection. LOSITAN was run using 100 000 simulations with a confidence intervals of 99.5%, a false discovery rate (FDR) of 0.05, and assuming a stepwise mutation model. Moreover, it has been demonstrated that the results based on LOSITAN may be biased by the presence of strong hierarchical population structure leading to increased level of false positives [47]. Therefore, we further performed the test based on the method of Beaumont & Nichols [45] as described by Excoffier *et al.* [47], which was performed under a hierarchical island model with 100 000 simulated loci using Arlequin 3.5 [48].

**Population structure and differentiation.** Pairwise  $F_{ST}$  values were estimated based on neutral microsatellite dataset and locus Lpol03 and significance was adjusted using the Benjamini–Yekutieli multiple testing correction [49]. The global  $F_{ST}$  was calculated by GENEPOP 4.3. In order to compare the patterns of genetic structure between neutral and possible selected



loci, principal coordinate analysis (PCoA) based on gene frequency data was performed using GenAlEx 6.5 [50]. The software STRUCTURE 2.3 [51, 52] was applied to cluster the samples on the basis of their microsatellite genotypes. We performed an independent assessment of the effects of both neutral and outlier loci on genetic structure. Ten replicates were run for all possible values of the maximum number of clusters (K) up to  $K = 16$  using the admixture model, and for each run, 2,000,000 iterations were carried out after a burn-in period of 200,000 iterations. The Evanno's method [51] implemented in Structure Harvester website was used to detect the optimum number of genetically homogeneous groups (K) [53]. In order to test the partitioning of genetic variation within and among putative groupings of samples, a hierarchical analysis of molecular variance (AMOVA) was conducted based on neutral microsatellite dataset with 10000 permutations using Arlequin 3.5.

**Demographic history and isolation by geographical distance.** Bottleneck software ver. 1.2.02 [54] was used to verify the existence of bottlenecks with 1,000 iterations under the infinite allele model (IAM), stepwise-mutation model (SMM) and two-phased model of mutation (TPM). Significance was tested using the Wilcoxon signed-rank test (Wilcoxon, 1945). Qualitative test of model shift was performed to calculate the allele frequency distribution using Bottleneck 1.2.02 [54]. The effects of geographical isolation on the genetic structure were assessed by the pattern of isolation by distance (IBD). Pairwise geographic distance between two collections was estimated as the nearest marine distance using Google Maps. IBD regression analysis was performed online using the IBD web service [55] with 10,000 randomizations.

## Results

### Genetic diversity

Summary statistics of 15 microsatellite loci in the 15 populations are shown in [Table 1](#) & [S1 Table](#). A total of 462 alleles were detected across all 15 loci, with the number of alleles per locus ranging from 15 for locus Lpol11 to 43 for locus Lpol15. Average  $A_R$  per sample was highest in NEA (11.824) and lowest in DY (10.085). The average of expected heterozygosity ranged from 0.862 (DY) to 0.900 (NEA) and the average of observed heterozygosity varied from 0.870 (DY) to 0.924 (CJK), respectively. The average of  $PIC$  values ranged from 0.814 to 0.869 ([Table 1](#)), suggesting a high level of genetic diversity. For all samples and loci combinations, no linkage disequilibrium was detected in the 15 populations. However, seven cases of locus-population combination out of 240 showed significant departure from Hardy-Weinberg equilibrium (HWE) after sequential Bonferroni correction ( $P < 0.0005$ , [S1 Table](#)). The MICRO-CHECKER analysis revealed that the loci Lpol05, Lpol11, Lpol16 and Lpol17 may include null alleles in one to four populations. However, we used all loci in this study because no locus was affected by null alleles in all samples.

### Outlier detection

Two loci (Lpol03 and Lpol04) were identified as outliers at the 99.5% confidence interval after FDR correction, with  $F_{ST}$  values of 0.094 and 0.023, respectively ([S1 Fig](#)). Nevertheless, there were also two loci (Lpol03 and Lpol06) identified as putatively under positive selection at the significant level of 0.01 under hierarchical island model ([S2 Fig](#)). The consistent results of both outlier tests suggested Lpol03 was a candidate locus under directional selection. The result of NCBI blastn search against refseq\_genomic database for the flanking region sequences of Lpol03 showed strong similarity to Grid2 gene ( $E$ -value = 0; Identity = 97%) which encodes the glutamate receptor  $\delta 2$  protein (GluR $\delta 2$ ), an excitatory receptor for glutamate. The Lpol03 with a fragment of 454 bp was found to be located in the intron of Grid2 gene in a genomic scaffold of *Larimichthys crocea*.

**Table 2. Matrix of pairwise  $F_{ST}$  values between populations based on neutral microsatellite datasets (below diagonal) and locus Lpol03(above diagonal).**

|     | DD            | BLA           | BLB           | QHD           | DY            | WH            | QD            | SYA           | SYB           | SYC           | CJK           | NEA           | NEB           | WL            | XP            |
|-----|---------------|---------------|---------------|---------------|---------------|---------------|---------------|---------------|---------------|---------------|---------------|---------------|---------------|---------------|---------------|
| DD  |               | -0.0140       | 0.0028        | -0.0078       | <b>0.1769</b> | <b>0.1902</b> | <b>0.2170</b> | 0.0019        | 0.0179        | <b>0.1158</b> | -0.0076       | <b>0.1359</b> | <b>0.1594</b> | -0.0104       | -0.0112       |
| BLA | 0.0060        |               | -0.0052       | -0.0072       | <b>0.1687</b> | <b>0.1857</b> | <b>0.2137</b> | -0.0015       | 0.0085        | <b>0.1083</b> | -0.0010       | <b>0.1314</b> | <b>0.1512</b> | -0.0053       | -0.0113       |
| BLB | 0.0054        | -0.0019       |               | -0.0014       | <b>0.1519</b> | <b>0.1689</b> | <b>0.1919</b> | 0.0012        | -0.0133       | <b>0.0889</b> | 0.0267        | <b>0.1131</b> | <b>0.1390</b> | 0.0032        | -0.0083       |
| QHD | 0.0022        | 0.0026        | 0.0038        |               | <b>0.1773</b> | <b>0.1930</b> | <b>0.2175</b> | -0.0056       | 0.0261        | <b>0.1056</b> | -0.0051       | <b>0.1354</b> | <b>0.1641</b> | -0.0161       | -0.0145       |
| DY  | 0.0037        | -0.0002       | 0.0059        | 0.0042        |               | 0.0076        | 0.0209        | <b>0.1692</b> | <b>0.1564</b> | 0.0195        | <b>0.2208</b> | 0.0088        | -0.0078       | <b>0.1511</b> | <b>0.1745</b> |
| WH  | 0.0020        | 0.0074        | 0.0054        | 0.0060        | 0.0080        |               | -0.0140       | <b>0.1848</b> | <b>0.1746</b> | <b>0.0772</b> | <b>0.2265</b> | 0.0223        | 0.0066        | <b>0.1649</b> | <b>0.1905</b> |
| QD  | 0.0005        | 0.0063        | 0.0067        | 0.0070        | 0.0020        | 0.0006        |               | <b>0.2139</b> | <b>0.1980</b> | <b>0.0910</b> | <b>0.2543</b> | 0.0306        | 0.0219        | <b>0.1884</b> | <b>0.2148</b> |
| SYA | 0.0019        | 0.0027        | 0.0053        | 0.0063        | 0.0044        | 0.0044        | 0.0086        |               | 0.0194        | <b>0.1102</b> | 0.0199        | <b>0.1285</b> | <b>0.1496</b> | 0.0038        | -0.0019       |
| SYB | 0.0078        | 0.0054        | 0.0015        | 0.0068        | 0.0131        | 0.0090        | 0.0020        | 0.0089        |               | <b>0.0984</b> | 0.0454        | <b>0.1187</b> | <b>0.1432</b> | 0.0250        | 0.0065        |
| SYC | <b>0.0192</b> | <b>0.0127</b> | <b>0.0121</b> | <b>0.0119</b> | 0.0122        | <b>0.0130</b> | 0.0096        | <b>0.0120</b> | <b>0.0124</b> |               | <b>0.1613</b> | 0.0166        | 0.0322        | <b>0.0917</b> | <b>0.1098</b> |
| CJK | 0.0043        | 0.0088        | 0.0068        | 0.0081        | 0.0029        | <b>0.0114</b> | 0.0097        | 0.0098        | 0.0094        | <b>0.0184</b> |               | <b>0.1763</b> | <b>0.2000</b> | 0.0030        | -0.0051       |
| NEA | 0.0029        | 0.0025        | 0.0038        | 0.0041        | 0.0030        | 0.0016        | 0.0011        | 0.0006        | 0.0035        | 0.0046        | 0.0045        |               | -0.0053       | <b>0.1129</b> | <b>0.1353</b> |
| NEB | 0.0061        | 0.0066        | 0.0052        | 0.0072        | 0.0067        | 0.0028        | 0.0019        | 0.0063        | 0.0054        | <b>0.0100</b> | 0.0080        | -0.0084       |               | <b>0.1378</b> | <b>0.1629</b> |
| WL  | 0.0010        | 0.0080        | 0.0048        | 0.0027        | 0.0069        | 0.0076        | <b>0.0108</b> | 0.0026        | <b>0.0117</b> | <b>0.0128</b> | 0.0066        | 0.0031        | 0.0092        |               | -0.0050       |
| XP  | 0.0026        | 0.0052        | 0.0031        | 0.0006        | 0.0042        | 0.0086        | 0.0054        | 0.0069        | 0.0072        | <b>0.0161</b> | 0.0056        | 0.0043        | 0.0067        | 0.0035        |               |

Significant values after a Benjamini–Yekutieli correction based on the false discovery rate approach ( $P < 0.00908$ ) are highlighted in bold.

doi:10.1371/journal.pone.0154020.t002

### Genetic differentiation and population structure

The global  $F_{ST}$  among all populations based on neutral loci and the outlier locus Lpol03 were 0.0036 and 0.0915, respectively. Pairwise  $F_{ST}$  values among samples based on neutral loci ranged from -0.0084 (between NEA and NEB) to 0.0184 (between SYC and CJK). Moreover, most  $F_{ST}$  values between SYC and other sampling populations were statistically significant after Benjamini–Yekutieli correction (Table 2). Approximately half the comparisons based on locus Lpol03 yielded highly significant  $F_{ST}$  values after Benjamini–Yekutieli correction (ranging from 0.0772 to 0.2543,  $P < 0.00908$ ). Pairwise  $F_{ST}$  results based on the outlier locus Lpol03 exhibited an overall higher value than those based on neutral loci, suggesting the existence of genetically differentiated populations of *L. polyactis* under directional selection. PCoA plotting based on neutral loci indicated no clear population structure among populations and a genetic distinctiveness of sample SYC (Fig 2A). However, PCoA plotting for locus Lpol03 showed two clearly differentiated groups: DD, BLA, BLB, QHD, SYA, SYB, CJK, WL and XP clustered as one group, while QD, WH, DY, NEA, NEB and SYC grouped as another distinct cluster (Fig 2B). Overall, the PCoA plotting analysis illustrated a pattern consistent with previous estimates of population structure derived from pairwise  $F_{ST}$  based on the neutral loci and outlier locus Lpol03. In simulations of the Bayesian clustering method to evaluate genetic structure, the mean  $\Delta K$  values suggested 3 clusters as the most likely population structure for the neutral dataset (S3 Fig), while the number of genetic groups best fitting for the outlier locus Lpol03 was 2 (S4 Fig). Using  $K = 3$  in STRUCTURE, we found that the 15 populations did not show any distinct population genetic structure based on the neutral datasets. Conversely, strikingly different result was obtained based on Lpol03 locus, which showed that two distinct genetic clusters were identified (Fig 3). When the AMOVA was performed without considering hypothetical grouping of populations, no significant genetic variability was observed among populations. However, the hierarchical AMOVA conducted with populations grouped according to sampling time revealed low but significant genetic variance among groups ( $P = 0.000$ ) respectively. Conversely, with populations grouped according to geographic origins, the AMOVA

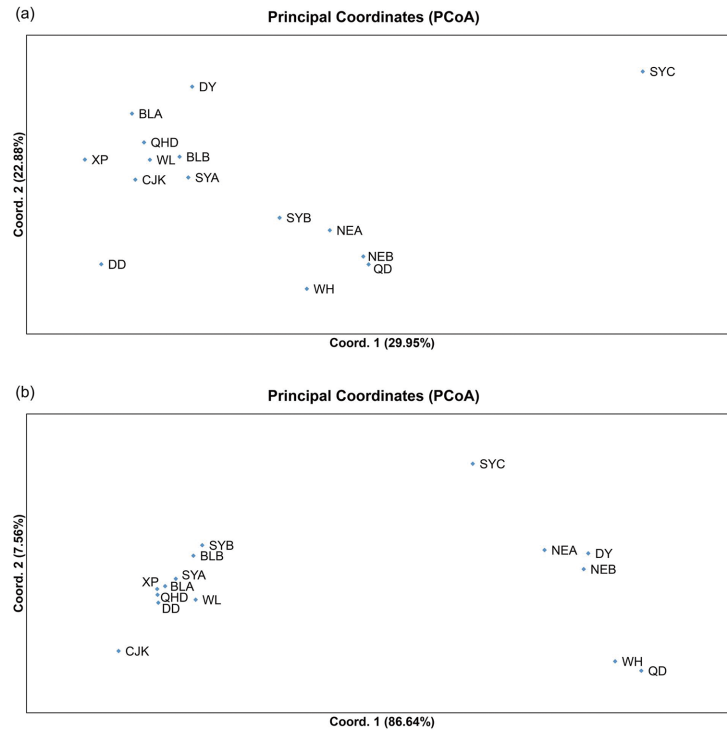

**Fig 2.** PCoA plotting of population differentiation based on (a) neutral microsatellites; (b) locus Lpol03.

doi:10.1371/journal.pone.0154020.g002

showed nonsignificant genetic differentiation among groups ( $P = 0.112$  and  $0.131$ ) respectively ([S2 Table](#)).

## Population demography and isolation by distance

Genetic bottleneck analysis showed no significant heterozygotes excess in all of the 15 populations under the two-phase model (TPM) and the stepwise mutation model (SMM), only the test based on the infinite alleles model (IAM) identified several excess of heterozygosity ([S3 Table](#)). Given that microsatellite mutations are thought to occur largely through a stepwise process, a combination of the SMM and IAM is expected to provide best estimate of equilibrium heterozygosity for the bottleneck analysis [56]. The absence of heterozygosity excess under both the SMM and the TPM models suggested that all the populations were at mutation-drift equilibrium. These results were also consistent with the normal L-shaped distribution of allele frequency, indicating no genetic bottleneck in the recent past. IBD analysis showed that there was no evidence of isolation by distance pattern ( $P > 0.05$ ), potentially indicating the persistence of high-level gene flow.

## Discussion

### Genetic diversity and population differentiation

In the present study, slight heterozygote deficiency in all populations was observed, which might be attributed to Wahlund effect resulting from mixing of fish from different breeding areas [57]. Deviation from HWE might be explained by decreases in population size as a result of commercial exploitation, in which the consequences are similar to those of the founder effect [58, 59]. In addition to population-level processes, the null alleles frequently found at



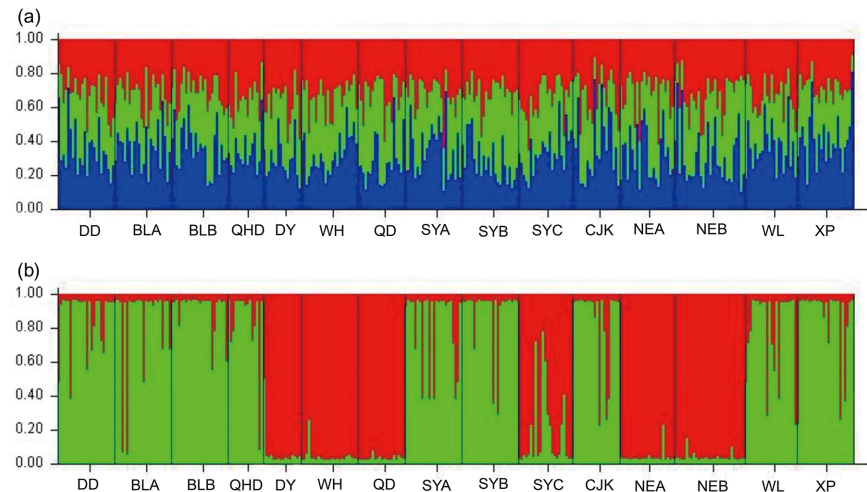

**Fig 3. Plotting results of the program STRUCTURE for neutral loci (a) with  $K = 3$ , and for locus Lpol03 (b) with  $K = 2$ , respectively.** Each population is shown as plots and each individual is represented by a single vertical line of different colors, indicating the groups they belong to.

doi:10.1371/journal.pone.0154020.g003

microsatellite loci, which also have been reported in many other fish species [60–62], could probably explain deviations from HWE. The high genetic diversity in microsatellite loci of *L. polyactis* might be attributed to high mutation rate and large population size [63]. The 15 highly polymorphic microsatellites provided much more genetic information than the RAPD, AFLP and mtDNA markers in previous studies on *L. polyactis* [30, 31, 34, 64, 65]. Moreover, as suggested by AMOVA and IBD regression analysis, no evidence of isolation by distance was observed, which further reflected high degree of genetic connectivity among different geographical populations of *L. polyactis*. However, it should be noted that differentiation between groups clustered by sampling time was supported by the AMOVA (S2 Table), even though the proportion of genetic variation is relatively low.

### Combining neutral and selected loci to assess population structure

It has been suggested that genomic regions showing high divergence may represent signatures of local adaptation or genomic islands of divergence recalcitrant to gene flow [66, 67]. In the present study, no significant population structure was identified in *L. polyactis* based on neutral microsatellite markers, suggesting the existence of high gene flow, which was consistent with previous results based on microsatellite markers and mtDNA analysis [34, 36]. Conversely, strikingly different results were obtained when using Lpol03 locus identified as candidate outlier potentially under positive selection, which showed evidence for predominant divergence among populations of *L. polyactis*. Significant population differentiation were also observed based on outlier microsatellite loci associated with temperature in Wang *et al.* (2013). No isolation by distance was detected among populations of *L. polyactis*, which was also in accordance with previous results using both neutral and outlier microsatellite loci in Wang *et al.* [4]. The patterns of population divergence observed in the present study were generally consistent with previous studies based on a different battery of microsatellites, reflecting the effects of both gene flow and local adaptation on population structure.

The genomic sequence containing the outlier Lpol03 showed a strong homology with Grid2 gene encoding the glutamate receptor  $\delta 2$  protein (GluR $\delta 2$ ), an excitatory receptor for glutamate, which is critically important for dendrite development and synapse formation during

neuronal growth such as motor learning and neural wiring [68, 69]. Mikami *et al.* found that the expression of zebrafish GluR $\delta$ 2 is selective for cerebellum-like neural wiring [69]. In general, glutamate neurotransmitters are involved in a variety of stimulus-induced actions such as stress, aggressiveness, locomotion as well as exploring behavior, which were considered to be important for food accessibility and size-related sex determination for fish [70]. As most anadromous fishes have evolved strict homing behavior, significant variation in motor learning behavior may also be attributed to separate wild groups matched to different strict homing behaviors with spatial and temporal changes [71]. It has been demonstrated that false positives of outlier detection can result from recent population bottlenecks or geographical structure [72, 73]. Neither genetic bottleneck nor isolation by distance was detected in *L. polyactis*, providing support to the validation of the outlier loci detected. Therefore, these results led us to conclude that a cryptic adaptive population structure might exist in populations of *L. polyactis*, hence illustrating that local selection pressures might override homogenizing effects of high level gene flow [14, 74].

### Evidence for isolation by marine environment in overwintering aggregations

In the present study, all the analyses based on the outlier locus Lpol03 indicated that two distinct genetically distinct groups existed among the 15 samples. Moreover, clear genetic differentiation were detected between the overwintering samples from the Yellow Sea (SYA, SYB) and those from the East China Sea (NEA, NEB), indicating that there were two genetically distinct overwintering aggregations, which was consistent with the previous findings based on capture fishery data [23]. During the winter monsoon from late October to early April, a period when *L. polyactis* aggregate in the overwintering grounds, a strong thermohaline front forms in the southeastern Yellow Sea (YSWC), which represents an area with a sharp cline in oceanographical conditions such as temperature and salinity and thus acts as physical barriers to exchange in the marine environment [75]. Likewise, environmental mechanisms, as contributing and interacting factors in determining population distribution of marine fish, have continually drawn attention in recent population dynamics studies of marine organisms [76]. For example, Li *et al.* [77] found that the wintering migration of Japanese anchovy (*Engraulis japonicus*) could be driven by spatially varying environmental factors such as water temperature and salinity, and both Yellow Sea Cold Water Mass (YSCWM) and YSWC were demonstrated to have a remarkable influence on the migration and distribution of Japanese anchovy. Moreover, genetic composition of individuals from the overwintering population of SYC were more affiliated with those from the East China Sea overwintering populations (NEA, NEB). Xu *et al.* (2009) [24] reported that the overwintering aggregations in the southern Yellow Sea are admixtures of relatively isolated spawning groups of *L. polyactis*, which is consistent with findings in the present study. Possible causes for this process may be attributed to the fact that the YSWC weakens in late spring when the spawning migration of *L. polyactis* begins [75, 78], which therefore leads to a temporal exchange of individuals from the two isolated overwintering aggregations in the Yellow Sea and East China Sea.

### Inference for novel migration routes of *L. polyactis*

Population structure analyses based on the outlier locus Lpol03 indicated that spawning individuals from WL and XP showed more similarity to the Yellow Sea overwintering population (SYA and SYB) rather than the East China Sea overwintering group (NEA and NEB). The result was consistent with previous results detected by diversifying microsatellite markers, which indicated that populations in the CECS (Central East China Sea) were significantly

differentiated from those in the NECS (North East China Sea) [4]. In addition, no clear geographical pattern of population genetic differentiation was observed in the present study based on the outlier locus Lpol03, which is consistent with the population structure detected with loci under diversifying selection in Wang *et al.* [4]. Therefore, our results suggested that spawning groups of *L. polyactis* inhabiting in the two overwintering grounds were locally adapted to multiple migration routes. For the Yellow Sea overwintering aggregation: one spawning group migrated northward to the northern part of Bohai Sea and Yellow Sea; the other one migrated southward to the coastal waters of the Central East China Sea and the Yangtze River estuary. Furthermore, overwintering aggregations from the North East China Sea mainly migrated to coastal areas off Shandong Peninsula. Interestingly, individuals of both overwintering groups spawn in separate areas of the Bohai Sea (Fig 1). One important oceanographic factor influencing the migration and distribution of *L. polyactis* in the Bohai Sea could be the existence of Northern Yellow Sea Cold Water Mass (NYSCWM), which is a unique hydrographic phenomenon in the Yellow Sea [79]. The center of NYSCWM locates outside Bohai Strait, forming a stable water mass with low temperature and high salinity from May to October, which may affect the spawning and overwintering migration routes of *L. polyactis* between the two overwintering grounds in the Yellow Sea and the East China Sea and the coastal spawning areas [79].

## Conclusions

Although high gene flow was indicated by the neutral microsatellites, two genetically differentiated overwintering populations of *L. polyactis* were highlighted by the outlier locus potentially under selection, one mainly in the East China Sea and the other in the Yellow Sea. Accordingly, a novel migration pattern of *L. polyactis* was also suggested, which was inconsistent with results of previous studies inferred by traditional approaches [23]. It should be noted that although potential migrants were identified based on the outlier data, suggesting the existence of gene flow between the two migratory groups of *L. polyactis*, there were also strong evidence that gene flow between the two migratory groups might be limited by local adaptation. Population structure based on the outlier locus Lpol03 reported in our study exhibited a high level of genetic differentiation, which was in concordance with previous results based on genetic markers as well as capture data. In total, the consistent results suggested that the outlier locus Lpol03 was a candidate loci with stronger discriminating power leading to increased accuracy for future MSA studies. Future research should aim to generate a comprehensive link between the spawning groups and overwintering aggregations of *L. polyactis*, and to use the gene-associated marker in combination with seascape variables, which would provide a powerful means for uncovering the processes leading to adaptive divergence. Overall, the present study provided new insights into the population genetic structure and migratory routine of *L. polyactis*, which would have significant implications for the sustainable management and utilization of this important marine fishery resource.

## Supporting Information

**S1 Fig. Comparison of  $F_{ST}$  and  $H_E$  in the polymorphic loci of *L. polyactis* used to identify outliers and potential candidates for selection with the LOSITAN software.** The graphical output shows the simulated confidence area for neutral loci (pale gray), positive selection (red) and balancing selection (yellow). Loci outliers are tagged with labels.

(TIF)

**S2 Fig. Graphical output of the joint distribution of heterozygosity ( $H_E$ ) and  $F_{ST}$  generated by ARLEQUIN to detect loci potentially under selection in a hierarchical level.** Loci significant at the 5% level are shown as *filled blue circles*, while loci significant at the 1% level are shown as *red filled circles*. Loci below or above the *red lines* are marked as *filled red circles* and correspond to markers potentially under balancing or directional selection, respectively.

(TIF)

**S3 Fig.  $\Delta K$  values calculated according to Evanno et al. (2005) for neutral loci data sets.**

(TIF)

**S4 Fig.  $\Delta K$  values calculated according to Evanno et al. (2005) for outlier locus Lpol03.**

(TIF)

**S1 File. Microsatellite genotype data for *Larimichthys polyactis*.**

(TXT)

**S1 Table. Summary of the statistics for fifteen microsatellite loci.**

(DOCX)

**S2 Table. Analysis of molecular variance (AMOVA) based on neutral microsatellite data-sets.**

(DOCX)

**S3 Table. Signed rank Wilcoxon test of the mutation–drift equilibrium estimated for fifteen microsatellite loci in populations of *L. polyactis*.**

(DOCX)

## Acknowledgments

We would like to thank Dr. Hui Zhang, Dr. Weiwei Xian for collecting samples.

## Author Contributions

Conceived and designed the experiments: B JL BDZ JXL. Performed the experiments: B JL BDZ. Analyzed the data: B JL BDZ DXX. Contributed reagents/materials/analysis tools: TXG. Wrote the paper: B JL BDZ TXG DXX JXL.

## References

1. Knutsen H, Jorde PE, Andre C, Stenseth NC. Fine-scaled geographical population structuring in a highly mobile marine species: the Atlantic cod. *Mol Ecol*. 2003; 12(2):385–94. doi: [10.1046/j.1365-294X.2003.01750.x](https://doi.org/10.1046/j.1365-294X.2003.01750.x) PMID: [WOS:000180421000007](https://pubmed.ncbi.nlm.nih.gov/100180421/).
2. Shikano T, Shimada Y, Herczeg G, Merila J. History vs. habitat type: explaining the genetic structure of European nine-spined stickleback (*Pungitius pungitius*) populations. *Mol Ecol*. 2010; 19(6):1147–61. doi: [10.1111/j.1365-294X.2010.04553.x](https://doi.org/10.1111/j.1365-294X.2010.04553.x) PMID: [WOS:000274906000009](https://pubmed.ncbi.nlm.nih.gov/200274906000009/).
3. Russello MA, Kirk SL, Frazer KK, Askey PJ. Detection of outlier loci and their utility for fisheries management. *Evolutionary Applications*. 2012; 5(1):39–52. doi: [10.1111/j.1752-4571.2011.00206.x](https://doi.org/10.1111/j.1752-4571.2011.00206.x) PMID: [WOS:000300701200005](https://pubmed.ncbi.nlm.nih.gov/2000300701200005/).
4. Wang L, Liu S, Zhuang Z, Guo L, Meng Z, Lin H. Population genetic studies revealed local adaptation in a high gene-flow marine fish, the small yellow croaker (*Larimichthys polyactis*). *PLoS One*. 2013; 8(12):e83493. doi: [10.1371/journal.pone.0083493](https://doi.org/10.1371/journal.pone.0083493) PMID: [24349521](https://pubmed.ncbi.nlm.nih.gov/24349521/); PubMed Central PMCID: PMC3861527.
5. Nielsen EE, Nielsen PH, Meldrup D, Hansen MM. Genetic population structure of turbot (*Scophthalmus maximus* L.) supports the presence of multiple hybrid zones for marine fishes in the transition zone between the Baltic Sea and the North Sea. *Mol Ecol*. 2004; 13(3):585–95. doi: [10.1046/j.1365-294X.2004.02097.x](https://doi.org/10.1046/j.1365-294X.2004.02097.x) PMID: [WOS:000188825700007](https://pubmed.ncbi.nlm.nih.gov/100188825700007/).

6. Bekkevoeld D, Andre C, Dahlgren TG, Clausen LAW, Torstensen E, Mosegaard H, et al. Environmental correlates of population differentiation in Atlantic herring. *Evolution*. 2005; 59(12):2656–68. PMID: [WOS:000234502400015](#).
7. Was A, Gosling E, McCrann K, Mork J. Evidence for population structuring of blue whiting (*Micromesistius poutassou*) in the Northeast Atlantic. *ICES J Mar Sci*. 2008; 65(2):216–25. doi: [10.1093/icesjms/fsm187](#) PMID: [WOS:000254274200011](#).
8. Cunningham KM, Canino MF, Spies IB, Hauser L. Genetic isolation by distance and localized fjord population structure in Pacific cod (*Gadus macrocephalus*): limited effective dispersal in the northeastern Pacific Ocean. *Can J Fish Aquat Sci*. 2009; 66(1):153–66. PMID: [WOS:000264957200015](#).
9. Andre C, Larsson LC, Laikre L, Bekkevoeld D, Brigham J, Carvalho GR, et al. Detecting population structure in a high gene-flow species, Atlantic herring (*Clupea harengus*): direct, simultaneous evaluation of neutral vs putatively selected loci. *Heredity*. 2011; 106(2):270–80. doi: [10.1038/hdy.2010.71](#) PMID: [WOS:000286375300009](#).
10. Lamichhaney S, Barrio AM, Rafati N, Sundstrom G, Rubin C- J, Gilbert ER, et al. Population-scale sequencing reveals genetic differentiation due to local adaptation in Atlantic herring. *Proc Natl Acad Sci U S A*. 2012; 109(47):19345–50. doi: [10.1073/pnas.1216128109](#) PMID: [WOS:000311997200067](#).
11. Gagnaire PA, Normandeau E, Cote C, Moller Hansen M, Bernatchez L. The genetic consequences of spatially varying selection in the panmictic American eel (*Anguilla rostrata*). *Genetics*. 2012; 190(2):725–36. doi: [10.1534/genetics.111.134825](#) PMID: [22135355](#); PubMed Central PMCID: [PMC3276646](#).
12. Vandamme SG, Maes GE, Raeymaekers JAM, Cottene K, Imsland AK, Hellems B, et al. Regional environmental pressure influences population differentiation in turbot (*Scophthalmus maximus*). *Mol Ecol*. 2014; 23(3):618–36. doi: [10.1111/mec.12628](#) PMID: [WOS:000329980000011](#).
13. Larmuseau MHD, Raeymaekers JAM, Ruddick KG, Van Houdt JKJ, Volckaert FAM. To see in different seas: spatial variation in the rhodopsin gene of the sand goby (*Pomatoschistus minutus*). *Mol Ecol*. 2009; 18(20):4227–39. doi: [10.1111/j.1365-294X.2009.04331.x](#) PMID: [WOS:000270665900010](#).
14. Teacher AGF, Andre C, Jonsson PR, Merila J. Oceanographic connectivity and environmental correlates of genetic structuring in Atlantic herring in the Baltic Sea. *Evolutionary Applications*. 2013; 6(3):549–67. doi: [10.1111/eva.12042](#) PMID: [WOS:000316957800013](#).
15. Florin A-B, Franzen F. Spawning site fidelity in Baltic Sea turbot (*Psetta maxima*). *Fisheries Research*. 2010; 102(1–2):207–13. doi: [10.1016/j.fishres.2009.12.002](#) PMID: [WOS:000274323200023](#).
16. Galarza JA, Carreras-Carbonell J, Macpherson E, Pascual M, Roques S, Turner GF, et al. The influence of oceanographic fronts and early-life-history traits on connectivity among littoral fish species. *Proc Natl Acad Sci U S A*. 2009; 106(5):1473–8. doi: [10.1073/pnas.0806804106](#) PMID: [WOS:000263074600035](#).
17. White C, Selkoe KA, Watson J, Siegel DA, Zacherl DC, Toonen RJ. Ocean currents help explain population genetic structure. *Proceedings of the Royal Society B-Biological Sciences*. 2010; 277(1688):1685–94. doi: [10.1098/rspb.2009.2214](#) PMID: [WOS:000276997700009](#).
18. Hilborn R, Quinn TP, Schindler DE, Rogers DE. Biocomplexity and fisheries sustainability. *Proc Natl Acad Sci U S A*. 2003; 100(11):6564–8. doi: [10.1073/pnas.1037274100](#) PMID: [WOS:000183190700050](#).
19. Schindler DE, Hilborn R, Chasco B, Boatright CP, Quinn TP, Rogers LA, et al. Population diversity and the portfolio effect in an exploited species. *Nature*. 2010; 465(7298):609–12. doi: [10.1038/nature09060](#) PMID: [WOS:000278249000040](#).
20. Chu YT. A study on the classification of the sciaenoid fishes of China, with description of new genera and species: Monographs of fishes of China; 1963. i-ii, 1–100 p.
21. Lin LS, Cheng JH, Li HY. The fishery biology of *Trichiurus japonicus* and *Larimichthys polyactis* in the East China Sea region. *Marine Fisheries*. 2008; 30(2):126–34. PMID: [ZOOREC:ZOOR14412073015](#).
22. Liu X. The research of small yellow croaker (*Larimichthys polyactis*) geographic race and gonad. Science Press, Beijing. 1962: 35–70.
23. Xu ZL, Chen JJ. Population division of *Larimichthys polyactis* in China Sea. *The Journal of Applied Ecology*. 2010; 21(11):2856–64. PMID: [CSCD:4048526](#).
24. ZI Xu, Chen JJ. Analysis on migratory routine of *Larimichthys polyactis*. *Journal of Fishery Sciences of China*. 2009; 16(6):931–40. PMID: [CSCD:3705926](#).
25. Jin XS. Long-term changes in fish community structure in the Bohai Sea, China. *Estuar Coast Shelf Sci*. 2004; 59(1):163–71. doi: [10.1016/j.ecss.2003.08.005](#) PMID: [WOS:000188123600014](#).
26. Froese R, Pauly D. Global capture production for *Larimichthys polyactis*. In: *FAO Fishery Statistic* FAO, Rome. 2003.



27. Li JS, Lin LS, Cheng JH. Distribution characteristic of small yellow croaker (*Larimichthys polyactis* Bleeker) and its relationship with bottom water temperature and salinity in the northern East China Sea in autumn. *Journal of Fishery Sciences of China*. 2009; 16(3):348–56. PMID: [CSCD:3627799](#).
28. Ding FY, Lin LS, Li JS, Cheng JH. Relationship between Redlip Croaker (*Larimichthys polyactis*) Spawning Stock Distribution and Water Masses Dynamics in Northern East China Sea Region. *Journal of Natural Resources*. 2007; 22(6):1013–9. PMID: [CSCD:3053285](#).
29. Lin LS, Cheng JH. An analysis of the current situation of fishery biology of small yellow croaker in the east china sea. *Journal of Ocean University of China*. 2004; 34(4):565–70. PMID: [CSCD:1597061](#).
30. Meng Z, Zhuang Z, Jin X, Tang Q, Su Y. Genetic diversity in small yellow croaker (*Pseudosciaena polyactis*) by RAPD analysis. *Chinese Biodiversity*. 2003; 11(3):197–203. PMID: [CSCD:1308947](#).
31. Lin LS, Ying YP, Han ZQ, Xiao YS, Gao TX. AFLP analysis on genetic diversity and population structure of small yellow croaker *Larimichthys polyactis*. *African Journal of Biotechnology*. 2009; 8(12):2700–6. PMID: [WOS:000268831200008](#).
32. Han ZQ, Lin LS, Shui BN, Gao TX. Genetic diversity of small yellow croaker *Larimichthys polyactis* revealed by AFLP markers. *African Journal of Agricultural Research*. 2009; 4(7):605–10. PMID: [WOS:000268829800006](#).
33. Kim JK, Kim Yh, Kim M-J, Park JY. Genetic diversity, relationships and demographic history of the small yellow croaker, *Larimichthys polyactis* (Pisces: Sciaenidae) from Korea and China inferred from mitochondrial control region sequence data. *Anim Cells Syst*. 2010; 14(1):45–51. doi: [10.1080/19768351003764973](#)
34. Xiao YS, Zhang Y, Gao TX, Yanagimoto T, Yabe M, Sakurai Y. Genetic diversity in the mtDNA control region and population structure in the small yellow croaker *Larimichthys polyactis*. *Environ Biol Fishes*. 2009; 85(4):303–14. doi: [10.1007/s10641-009-9497-0](#)
35. Galindo HM, Pfeiffer-Herbert AS, McManus MA, Chao Y, Chai F, Palumbi SR. Seascape genetics along a steep cline: using genetic patterns to test predictions of marine larval dispersal. *Mol Ecol*. 2010; 19(17):3692–707. doi: [10.1111/j.1365-294X.2010.04694.x](#) PMID: [WOS:000281285200015](#).
36. Li Y, Han Z, Song N, Gao TX. New evidence to genetic analysis of small yellow croaker (*Larimichthys polyactis*) with continuous distribution in China. *Biochemical Systematics and Ecology*. 2013; 50:331–8. doi: [10.1016/j.bse.2013.05.003](#)
37. Wang L, Liu S, Zhuang Z, Lin H, Meng Z. Mixed-stock analysis of small yellow croaker *Larimichthys polyactis* providing implications for stock conservation and management. *Fisheries Research*. 2015; 161:86–92.
38. Liu BJ, Gao TX, Liu JX. Development of 17 novel polymorphic microsatellites in the small yellow croaker *Larimichthys polyactis*. *Conserv Genet Resour*. 2014; 6(2):397–9. doi: [10.1007/s12686-013-0102-7](#) PMID: [WOS:000335959600038](#).
39. Liu JX, Avise JC. High degree of multiple paternity in the viviparous Shiner Perch, *Cymatogaster aggregata*, a fish with long-term female sperm storage. *Mar Biol*. 2011; 158(4):893–901. doi: [10.1007/s00227-010-1616-0](#) PMID: [WOS:000289539100017](#).
40. Park S. Trypanotolerance in West African cattle and the population genetic effects of selection. Ph D thesis, University of Dublin. 2001.
41. Goudet J. FSTAT, a program to estimate and test gene diversities and fixation indices (version 2.9.3). 2001.
42. Rousset F. Genepop'007: a complete re-implementation of the genepop software for Windows and Linux. *Molecular Ecology Resources*. 2008; 8(1):103–6. doi: [10.1111/j.1471-8286.2007.01931.x](#) PMID: [21585727](#)
43. Raymond M, Rousset F. Genepop (version-1.2)—population-genetics software for exact tests and ecumenicism. *J Hered*. 1995; 86(3):248–9. PMID: [WOS:A1995RB30200017](#).
44. van Oosterhout C, Hutchinson WF, Wills DP, Shipley P. Micro-Checker: software for identifying and correcting genotyping errors in microsatellite data. *Molecular Ecology Notes*. 2004; 4(3):535–8.
45. Beaumont MA, Nichols RA. Evaluating loci for use in the genetic analysis of population structure. *Proceedings of the Royal Society B-Biological Sciences*. 1996; 263(1377):1619–26. doi: [10.1098/rspb.1996.0237](#) PMID: [WOS:A1996WD19600001](#).
46. Antao T, Lopes A, Lopes RJ, Beja-Pereira A, Luikart G. LOSITAN: A workbench to detect molecular adaptation based on a *Fst*-outlier method. *BMC Bioinformatics*. 2008; 9(1):323. doi: [10.1186/1471-2105-9-323](#) PMID: [WOS:000258517000001](#).
47. Excoffier L, Hofer T, Foll M. Detecting loci under selection in a hierarchically structured population. *Heredity*. 2009; 103(4):285–98. doi: [10.1038/hdy.2009.74](#) PMID: [WOS:000270087700004](#).



48. Excoffier L, Lischer HEL. Arlequin suite ver 3.5: a new series of programs to perform population genetics analyses under Linux and Windows. *Mol Ecol Resour.* 2010; 10(3):564–7. doi: [10.1111/j.1755-0998.2010.02847.x](https://doi.org/10.1111/j.1755-0998.2010.02847.x) PMID: [WOS:000276407300020](https://pubmed.ncbi.nlm.nih.gov/200276407300020/).
49. Narum SR. Beyond Bonferroni: Less conservative analyses for conservation genetics. *Conservation Genetics.* 2006; 7(5):783–7. doi: [10.1007/s10592-005-9056-y](https://doi.org/10.1007/s10592-005-9056-y) PMID: [WOS:000240856100012](https://pubmed.ncbi.nlm.nih.gov/000240856100012/).
50. Peakall R, Smouse PE. GenAIEx 6.5: genetic analysis in Excel. Population genetic software for teaching and research—an update. *Bioinformatics.* 2012; 28(19):2537–9. doi: [10.1093/bioinformatics/bts460](https://doi.org/10.1093/bioinformatics/bts460) PMID: [WOS:000309687500024](https://pubmed.ncbi.nlm.nih.gov/000309687500024/).
51. Evanno G, Regnaut S, Goudet J. Detecting the number of clusters of individuals using the software STRUCTURE: a simulation study. *Molecular ecology.* 2005; 14(8):2611–20. PMID: [15969739](https://pubmed.ncbi.nlm.nih.gov/15969739/)
52. Pritchard J, Wen X, Falush D. Documentation for structure software: Version 2.3. University of Chicago, Chicago. 2009:1–37.
53. Earl DA. STRUCTURE HARVESTER: a website and program for visualizing STRUCTURE output and implementing the Evanno method. *Conservation Genetics Resources.* 2012; 4(2):359–61.
54. Piry S, Luikart G, Cornuet J. Computer note. BOTTLENECK: a computer program for detecting recent reductions in the effective size using allele frequency data. *Journal of Heredity.* 1999; 90(4):502–3.
55. Jensen JL, Bohonak AJ, Kelley ST. Isolation by distance, web service. *BMC genetics.* 2005; 6(1):13. doi: [10.1186/1471-2156-6-13](https://doi.org/10.1186/1471-2156-6-13) PMID: [WOS:000228164200001](https://pubmed.ncbi.nlm.nih.gov/000228164200001/).
56. Dirienzo A, Peterson AC, Garza JC, Valdes AM, Slatkin M, Freimer NB. Mutational processes of simple-sequence repeat loci in human-populations. *Proc Natl Acad Sci U S A.* 1994; 91(8):3166–70. PMID: [WOS:A1994NF96800063](https://pubmed.ncbi.nlm.nih.gov/A1994NF96800063/).
57. Wahlund S. Composition of populations from the perspective of the theory of heredity. *Hereditas.* 1928; 11(1):65–105.
58. Karlsson S, Mork J. Deviation from Hardy-Weinberg equilibrium, and temporal instability in allele frequencies at microsatellite loci in a local population of Atlantic cod. *ICES J Mar Sci.* 2005; 62(8):1588–96. doi: [10.1016/j.icesjms.2005.05.009](https://doi.org/10.1016/j.icesjms.2005.05.009) PMID: [WOS:000233778100004](https://pubmed.ncbi.nlm.nih.gov/000233778100004/).
59. Marchant S, Haye PA, Marin SA, Winkler FM. Genetic variability revealed with microsatellite markers in an introduced population of the abalone *Haliotis discus hannai* Ino. *Aquaculture Research.* 2009; 40(3):298–304. doi: [10.1111/j.1365-2109.2008.02089.x](https://doi.org/10.1111/j.1365-2109.2008.02089.x) PMID: [WOS:000262663000005](https://pubmed.ncbi.nlm.nih.gov/000262663000005/).
60. Banks MA, Blouin MS, Baldwin BA, Rashbrook VK, Fitzgerald HA, Blankenship SM, et al. Isolation and inheritance of novel microsatellites in chinook salmon (*Oncorhynchus tshawytscha*). *J Hered.* 1999; 90(2):281–8. doi: [10.1093/jhered/90.2.281](https://doi.org/10.1093/jhered/90.2.281) PMID: [WOS:000078904100004](https://pubmed.ncbi.nlm.nih.gov/000078904100004/).
61. Kim MJ, An HS, Choi KH. Genetic characteristics of Pacific cod populations in Korea based on microsatellite markers. *Fish Sci.* 2010; 76(4):595–603. doi: [10.1007/s12562-010-0249-z](https://doi.org/10.1007/s12562-010-0249-z) PMID: [WOS:000281973400007](https://pubmed.ncbi.nlm.nih.gov/000281973400007/).
62. An HS, Lee JW, Park JY, Jung HT. Genetic structure of the Korean black scraper *Thamnaconus modestus* inferred from microsatellite marker analysis. *Molecular biology reports.* 2013; 40(5):3445–56. doi: [10.1007/s11033-012-2044-7](https://doi.org/10.1007/s11033-012-2044-7) PMID: [WOS:000317075300001](https://pubmed.ncbi.nlm.nih.gov/000317075300001/).
63. Kimura M, Crow JF. Number of alleles that can be maintained in finite population. *Genetics.* 1964; 49(4):725–&. PMID: [WOS:A19641917B00012](https://pubmed.ncbi.nlm.nih.gov/A19641917B00012/).
64. Liu JX, Gao TX, Yokogawa K, Zhang YP. Differential population structuring and demographic history of two closely related fish species, Japanese sea bass (*Lateolabrax japonicus*) and spotted sea bass (*Lateolabrax maculatus*) in Northwestern Pacific. *Mol Phylogenet Evol.* 2006; 39(3):799–811. doi: [10.1016/j.ympev.2006.01.009](https://doi.org/10.1016/j.ympev.2006.01.009) PMID: [WOS:000238155300015](https://pubmed.ncbi.nlm.nih.gov/000238155300015/).
65. Xiao Y, Song N, Li J, Xiao Z, Gao T. Significant population genetic structure detected in the small yellow croaker *Larimichthys polyactis* inferred from mitochondrial control region. *Mitochondrial DNA.* 2015; 26(3):409–19. doi: [10.3109/19401736.2013.843076](https://doi.org/10.3109/19401736.2013.843076) PMID: [WOS:000356431700014](https://pubmed.ncbi.nlm.nih.gov/000356431700014/).
66. Strasburg JL, Scotti-Saintagne C, Scotti I, Lai Z, Rieseberg LH. Genomic patterns of adaptive divergence between chromosomally differentiated sunflower species. *Mol Biol Evol.* 2009; 26(6):1341–55. doi: [10.1093/molbev/msp043](https://doi.org/10.1093/molbev/msp043) PMID: [WOS:000266116500012](https://pubmed.ncbi.nlm.nih.gov/000266116500012/).
67. Turner TL, Hahn MW. Genomic islands of speciation or genomic islands and speciation? *Mol Ecol.* 2010; 19(5):848–50. doi: [10.1111/j.1365-294X.2010.04532.x](https://doi.org/10.1111/j.1365-294X.2010.04532.x) PMID: [WOS:000274550100002](https://pubmed.ncbi.nlm.nih.gov/000274550100002/).
68. Liu QA, Shio H. Mitochondrial morphogenesis, dendrite development, and synapse formation in cerebellum require both bcl-w and the glutamate receptor delta 2. *Plos Genetics.* 2008; 4(6). doi: [10.1371/journal.pgen.1000097](https://doi.org/10.1371/journal.pgen.1000097) PMID: [WOS:000260410300023](https://pubmed.ncbi.nlm.nih.gov/000260410300023/).
69. Mikami Y, Yoshida T, Matsuda N, Mishina M. Expression of zebrafish glutamate receptor delta 2 in neurons with cerebellum-like wiring. *Biochemical and Biophysical Research Communications.* 2004; 322(1):168–76. doi: [10.1016/j.bbrc.2004.07.095](https://doi.org/10.1016/j.bbrc.2004.07.095) PMID: [WOS:000223581000024](https://pubmed.ncbi.nlm.nih.gov/000223581000024/).

70. Pujolar JM, Jacobsen MW, Als TD, Frydenberg J, Munch K, Jonsson B, et al. Genome-wide single-generation signatures of local selection in the panmictic European eel. *Molecular Ecology*. 2014; 23(10):2514–28. doi: [10.1111/mec.12753](https://doi.org/10.1111/mec.12753) PMID: [WOS:000335808900011](https://pubmed.ncbi.nlm.nih.gov/2500335808900011/).
71. Kume K, Zylka MJ, Sriram S, Shearman LP, Weaver DR, Jin XW, et al. mCRY1 and mCRY2 are essential components of the negative limb of the circadian clock feedback loop. *Cell*. 1999; 98(2):193–205. doi: [10.1016/s0092-8674\(00\)81014-4](https://doi.org/10.1016/s0092-8674(00)81014-4) PMID: [WOS:000081632300009](https://pubmed.ncbi.nlm.nih.gov/1000081632300009/).
72. Fourcade Y, Chaput-Bardy A, Secondi J, Fleurant C, Lemaire C. Is local selection so widespread in river organisms? Fractal geometry of river networks leads to high bias in outlier detection. *Mol Ecol*. 2013; 22(8):2065–73. doi: [10.1111/mec.12158](https://doi.org/10.1111/mec.12158) PMID: [WOS:000317137200002](https://pubmed.ncbi.nlm.nih.gov/25000317137200002/).
73. Storz JF. Using genome scans of DNA polymorphism to infer adaptive population divergence. *Mol Ecol*. 2005; 14(3):671–88. doi: [10.1111/j.1365-294X.2004.02437.x](https://doi.org/10.1111/j.1365-294X.2004.02437.x) PMID: [WOS:000227132300001](https://pubmed.ncbi.nlm.nih.gov/25000227132300001/).
74. DeFaveri J, Jonsson PR, Merila J. Heterogeneous genomic differentiation in marine threespine sticklebacks: Adaptation along an environmental gradient. *Evolution*. 2013; 67(9):2530–46. doi: [10.1111/evo.12097](https://doi.org/10.1111/evo.12097) PMID: [WOS:000323828500006](https://pubmed.ncbi.nlm.nih.gov/25000323828500006/).
75. Lie HJ, Cho CH, Lee JH, Lee S, Tang YX, Zou EM. Does the Yellow Sea Warm Current really exist as a persistent mean flow? *Journal of Geophysical Research-Oceans*. 2001; 106(C10):22199–210. doi: [10.1029/2000jc000629](https://doi.org/10.1029/2000jc000629) PMID: [WOS:000171468300008](https://pubmed.ncbi.nlm.nih.gov/25000171468300008/).
76. Shepherd TD, Litvak MK. Density-dependent habitat selection and the ideal free distribution in marine fish spatial dynamics: considerations and cautions. *Fish Fish*. 2004; 5(2):141–52. doi: [10.1111/j.1467-2979.2004.00143.x](https://doi.org/10.1111/j.1467-2979.2004.00143.x) PMID: [WOS:000221948700004](https://pubmed.ncbi.nlm.nih.gov/25000221948700004/).
77. Li Y, Zhao XY, Zhang T, Li XS, Wei H. Wintering migration and distribution of anchovy in the Yellow Sea and its relation to physical environment. *Marine Fisheries Research*. 2007; 28(2):104–12. PMID: [CSCD:2857553](https://pubmed.ncbi.nlm.nih.gov/250002857553/).
78. Tang YX, Zou EM, Lie HJ. Some features of circulation in the southern Huanghai Sea. *Acta Oceanologica Sinica*. 2000; 22(1):1–16. PMID: [CSCD:734039](https://pubmed.ncbi.nlm.nih.gov/25000734039/).
79. Yu F, Zhang Zx, Diao XY, Gou JS, Tang YX. Analysis of evolution of the Huanghai Sea Cold Water Mass and its relationship with adjacent water masses. *Acta Oceanologica Sinica*. 2006; 28(5):26–34. PMID: [CSCD:2423929](https://pubmed.ncbi.nlm.nih.gov/250002423929/).
